# Supplementary material
Source: publisher site journal article supplement (https://www.spandidos-publications.com/2908/downloadSupplementary)

Figure S1. Methylation status of the *MUC22* promoter in LUSC and LUAD tissues. Promoter methylation of *MUC22* was analyzed by MSP. The targeted region by MSP primer pairs is shown in Fig. 2A. The primer sequences are listed in Table SII. MSP amplicons were visualized by agarose gel electrophoresis. (A) Diagram of *MUC22* transcript structure. (B) LUSC (n=24; T1-T24) and (C) LUAD (n=23; T1=T23, with one specimen deleted due to inadequate genomic DNA for measurement of bisulfite modification). *MUC22*, mucin 22; LUAD, lung adenocarcinoma; LUSC, lung squamous cell carcinoma; MSP, methylation specific-PCR; U, unmethylated; M, methylated.

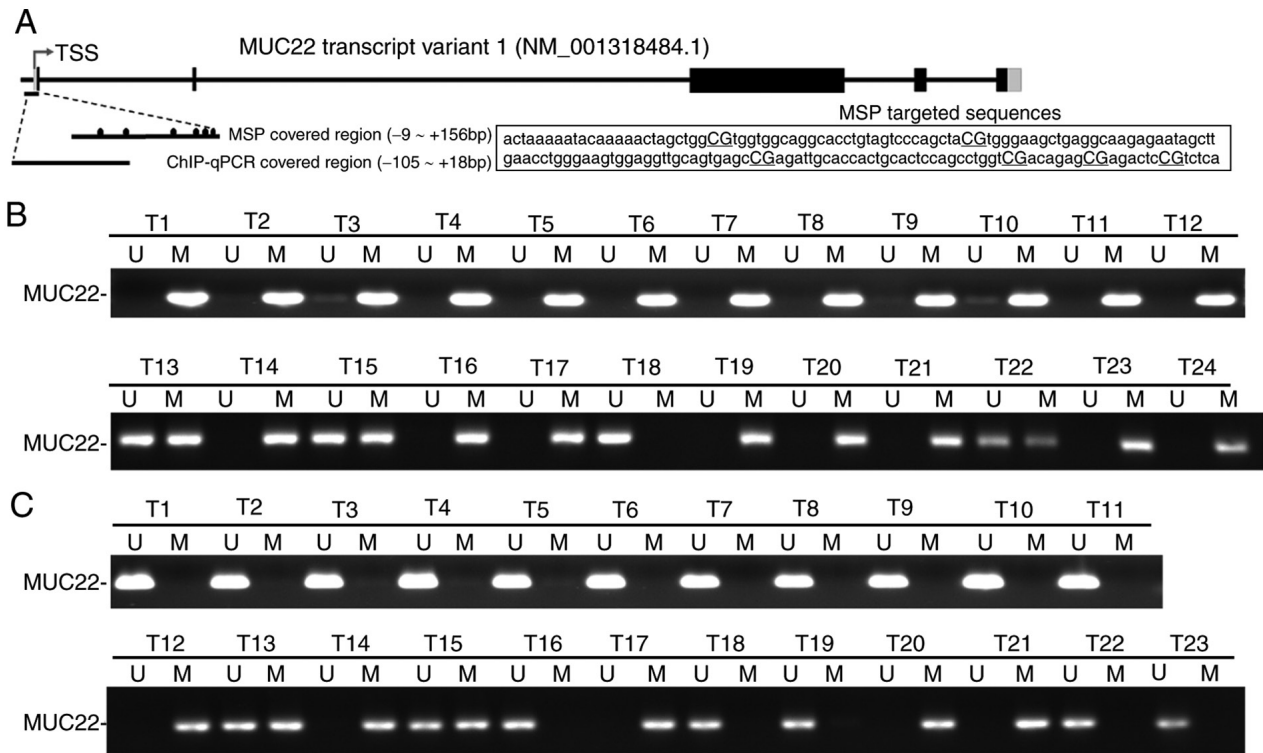

Supplement: Supplementary file 1 [file downloadSupplementary]
